# Supplementary material for: Neuropathology and cognitive performance in self-reported cognitively healthy centenarians
Source: Acta Neuropathol Commun. 2018 Jul 23;6:64. doi: 10.1186/s40478-018-0558-5 (PMC6055341; doi:10.1186/s40478-018-0558-5)
Supplement: Supplementary file 2 — Table S2. Subject demographics and overview of neuropathological hallmarks of centenarians. (XLSX 34 kb) [file 40478_2018_558_MOESM2_ESM.xlsx]

## Sheet: Supplemental Table 2
	Supplementary Table 2: Subject demographics and overview of neuropathological hallmarks of centenarians.
	100-plus Study number	Sex	number of visits	Age [y] atbaseline	MMSE at baseline	VAT score at baseline	CDT score at baseline	Age [y] at last visit	MMSE at last visit	VAT score at last visit	CDT score at last visit	ability to complete testing	cognitive health impression	Age [y] at death	Level of Education (ISCED, UNESCO)	Years of Education	post-mortem delay [h:m]	cause of death	ApoE genotype	Brain weight [g]	Atrophy	Thal stage Aβ (0-5)	Braak&Braak stage NFTs (0-VI)	Neuritic plaques (CERAD) (0-3)	AD neuropathologic change (NIA-Reagan)	AD neuropathologic change (NIA-AA)	Thal stage CAA (0-3)	Thal stage GVD (0-5)	Atherosclerosis (0-3)	Braak stage Lewy bodies (0-6)	TDP-43 stage in AD (0-3)	hippocampal sclerosis	ARTAG	infarcts
	100007	f	1	100.9	30	N/A	5	100.9	30	N/A	5	2	2	101.747	5	15	06:15	aspiration pneumonia, cachectic state	E3/E3	1155	0	3	3	0	A2B2C0	Intermediate	0	4	3	0	3	no	yes	no
	100006	f	1	100.34	22	N/A	1	100.34	22	N/A	1	2	2	101.648	5	13	07:27	Infection, palliative sedation	E3/E4	1150	1	4	4	1	A3B2C1	Intermediate	2	5	1	0	0	no	yes	yes, Cer
	100001	f	1	110.29	N/A	N/A	N/A	110.29	N/A	N/A	N/A	0	2	111.811	1	6	08:40	"old age"	E2/E3	972	1	4	3	2	A3B2C2	Intermediate	1	5	2	1	2	yes, left CA1	yes	yes, Par
	100047	m	1	102.54	9.25	N/A	N/A	102.54	9.25	N/A	N/A	1	1	102.949	3	10	05:26	sudden death (possibly myocardial infarct)	E3/E3	1130	1	3	4	2	A2B2C2	Intermediate	1	5	1	0	3	yes, bilateral	yes	yes. Cer
	100080	m	1	102.49	22	11	N/A	102.49	22	11	N/A	2	2	102.689	4	12	10:00	Cachexia	E2/E3	1230	1	0	3	0	A0B2C0	Not	0	4	3	0	1	no	yes	no
	100029	m	1	102.71	19.38	N/A	2	102.71	19.38	N/A	2	1	2	103.858	3	10	05:05	Chronic heart failure/palliative sedation	E3/E3	1195	0	3	2	1	A2B1C1	Low	1	5	2	1	2	yes, left	yes	no
	100069	f	1	102.95	27	9	3	102.95	27	9	3	2	2	103.828	5	18	08:24	Cachexia	E2/E4	1063	1	4	4	1	A3B2C1	Intermediate	2	5	1	0	3	no	yes	yes, F2
	100003	f	2	101.07	24	N/A	2	102.95	23	N/A	N/A	2	2	103.819	1	6	07:55	Cecum cancer, dehydration, cachexia	E3/E3	1065	0	1	2	0	A1B1C0	Low	0	4	3	0	0	N/A	yes	yes, Caud.
	100072	f	2	103.173	15	0	N/A	104.2	N/A	N/A	N/A	0	1	104.282	6	19	04:15	respiratory insufficiency	E3/E3	1180	0	5	4	2	A3B2C2	Intermediate	1	5	1	0	3	no	yes	no
	100085	m	1	102.018	23	7	1	102.02	23	7	1	2	2	102.979	4	9	07:45	Cascade after broken leg - full narcosis	E3/E3	1120	1.5	4	4	2	A3B2C2	Intermediate	2	5	2	0	2	no	yes	yes, Occ
	100133	f	1	101.57	21	5	5	101.57	21	5	5	2	2	102.097	2	6	06:10	unclear	E2/E3	1005	1	1	2	0	A1B1C0	Low	0	4	2	0	0	no	yes	yes, Thal
	100046	f	2	100.263	25	7	3	101.17	25	N/A	4	1	2	101.974	1	6	07:55	N/A	E3/E3	1165	0	1	3	0	A1B2C0	Low	1	4	1	0	0	no	yes	yes, F
	100103	m	1	100.279	25	10	3	100.28	25	10	3	2	2	101.153	5	18	05:30	N/A	E3/E4	1125	1	1	3	0	A1B2C0	Low	1	4	1	0	0	no	yes	no
	100074	m	2	105.665	25	8	3	106.54	N/A	N/A	N/A	0	N/A	107.168	4	9	05:30	Cascade after urinary tract infection	E3/E3	1330	0	5	3	1	A3B2C1	Intermediate	1	5	2	0	3	yes, bilateral	yes	no
	100073	f	2	100.947	28.67	N/A	N/A	101.87	26.32	N/A	N/A	2	2	102.579	4	10	05:17	N/A	E3/E3	1026	1	4	3	1	A3B2C1	Intermediate	3	4	1	0	1	no	yes	no
	100067	f	1	101.43	25	11	5	101.43	25	11	5	2	2	103.214	2	7	05:55	Pneumonia	E2/E3	1017	0	0	1	0	A0B1C0	Not	0	4	1	0	0	no	yes	no
	100021	f	3	101.89	27	5	2	104.21	26.82	N/A	N/A	2	2	104.816	5	15	07:55	CVA two weeks before death, palliative care	E3/E3	1095	2	1	3	0	A1B2C0	Low	1	5	2	6	2	N/A	yes	yes, Caud. Thal, Put
	100065	f	3	101.317	26	7	3	103.29	25	5	5	2	2	103.502	2	8	04:00	Decided to stop food and water intake after 2 CVAs and left side paralysis, died after two weeks	E3/E3	1095	0	3	4	1	A2B2C1	Intermediate	0	5	2	0	0	no	yes	yes
	100041	f	3	98.97	30	11	3	101.08	30	12	3	2	2	101.481	5	15	03:25	heart failure	E3/E3	1050	0	3	1	1	A1B1C1	Low	1	3	2	0	3	yes, right	yes	no
	100079	m	1	100.75	26	11	N/A	100.75	26	11	N/A	2	2	102.798	1	7	04:05	N/A	E3/E3	1255	1.5	3	3	1	A2B2C1	Intermediate	1	5	3	0	0	no	yes	yes, globus pallidus
	100199	f	1	100.18	25	10	2	100.18	25	10	2	2	N/A	100.936	1	6	08:40	N/A	E3/E3	1105	1	2	3	1	A1B2C1	Low	1	4	3	2	0	no	yes	no
	100155	f	1	103.06	26	5	5	103.06	26	5	5	2	2	104.553	6	20	12:00	Decided to stop food intake and died two months after from exhaustion	E3/E3	1004	1	3	2	1	A2B1C1	Low	1	4	2	0	0	no	yes	no
	100102	f	2	103.253	26	N/A	2	104.28	26	0	N/A	2	1	104.909	1	6	04:10	N/A	E2/E3	1185	1	4	4	1	A3B2C1	Intermediate	1	5	2	0	0	no	yes	no
	100145	f	2	100.186	24.37	12	N/A	101.18	15.55	8	N/A	2	1	101.429	1	6	06:40	N/A	E3/E3	1110	0	3	4	1	A2B2C1	Intermediate	1	5	1	0	0	no	yes	yes, P, Occ
	100262	f	1	100.241	14.97	N/A	N/A	100.24	14.97	N/A	N/A	2	1	100.37	1	6	05:00	detoriation after several severe TIAs, subsequent stop of medication, food and fluid intake	N/A	1115	0	1	3	0	A1B2C0	Low	1	5	1	0	0	no	yes	yes
	100154	f	1	107.299	25.66	4	N/A	107.3	25.66	4	N/A	2	2	108.446	1	6	06:10	N/A	E3/E3	965	1	2	2	0	A1B1C0	Low	1	4	3	0	0	no	yes	yes
	100010	f	3	98.32	26.99	9	4	101.02	30	2	4	2	2	102.007	4	N/A	08:30	N/A	E3/E3	1320	0	N/A	N/A	N/A	N/A	N/A	N/A	4	2	N/A	0	N/A	N/A	N/A
	100083	f	2	102.053	26	8	N/A	103.15	26.42	N/A	3	2	2	104.123	1	7	10:30	N/A	E3/E3	1155	0	N/A	N/A	N/A	N/A	N/A	N/A	5	2	N/A	3	N/A	N/A	N/A
	100002	m	2	101.17	N/A	N/A	N/A	103.03	N/A	N/A	N/A	0	N/A	105.196	2	9	06:05	N/A	E3/E3	1150	0	N/A	N/A	N/A	N/A	N/A	N/A	5	3	N/A	0	N/A	N/A	N/A
	100174	f	1	102.951	19	3	2	102.95	19	3	2	2	1	103.8	4	12	07:20	N/A	E3/E3	1145	0	N/A	N/A	N/A	N/A	N/A	N/A	5	3	N/A	0	N/A	N/A	N/A
	100214	f	1	101.49	23	5	3	101.49	23	5	3	2	2	102.409	2	8	05:50	N/A	E3/E3	1135	0	N/A	N/A	N/A	N/A	N/A	N/A	4	1	N/A	0	N/A	N/A	N/A
	100184	f	2	101.158	17	8	2	102.17	N/A	N/A	N/A	0	0	102.36	1	6	10:45	N/A	E3/E3	1130	0	N/A	N/A	N/A	N/A	N/A	N/A	5	2	N/A	0	N/A	N/A	N/A
	100084	m	3	100.29	25	7	1	102.43	15.03	4	N/A	2	1	102.59	3	8	06:40	N/A	E2/E3	1355	1	N/A	N/A	N/A	N/A	N/A	N/A	4	1	N/A	2	N/A	N/A	N/A
	100127	f	1	100.175	28.73	N/A	N/A	100.18	28.73	N/A	N/A	2	2	101.933	4	15	06:30	N/A	E3/E3	1115	2	N/A	N/A	N/A	N/A	N/A	N/A	4	2	N/A	0	N/A	N/A	N/A
	100068	m	3	100.359	26.49	N/A	N/A	102.32	23.47	7	N/A	2	2	103.159	1	7	05:30	N/A	E3/E3	1200	1	N/A	N/A	N/A	N/A	N/A	N/A	5	1	N/A	0	N/A	N/A	N/A
	100146	f	2	100.263	24	11	3	101.26	26	10	5	2	2	102.06	1	7	05:47	N/A	E3/E4	1055	1	N/A	N/A	N/A	N/A	N/A	N/A	N/A	3	N/A	N/A	N/A	N/A	N/A
	100086	f	3	102.149	29.47	N/A	N/A	104.2	28.46	N/A	N/A	2	2	104.664	4	10	07:05		E2/E4	1190	1	N/A	N/A	N/A	N/A	N/A	N/A	N/A	3	N/A	N/A	N/A	N/A	N/A
	100158	m	2	101.251	27.78	11	3	102.25	22	5	3	2	2	103.068	3	8	05:05		E3/E3	1060	2	N/A	N/A	N/A	N/A	N/A	N/A	N/A	3	N/A	N/A	N/A	N/A	N/A
	100148	f	1	100.323	24	2	1	100.32	24	2	1	2	2	102.293	3	12	08:15		E3/E3	1160	0	N/A	N/A	N/A	N/A	N/A	N/A	N/A	1	N/A	N/A	N/A	N/A	N/A
	100051	f	4	103.781	28	11	5	106.77	26	12	5	2	2	107.058	3	8	05:40		E3/E3	1145	0	N/A	N/A	N/A	N/A	N/A	N/A	N/A	1	N/A	N/A	N/A	N/A	N/A
	Abbreviations: ApoE, Apolipoprotein E; MMSE, Mini Mental State Examination; CDT, Clock Drawing Test; VAT, Visual Association Test; Aβ, Amyloid beta; NFT, neurofibrillary tangle; CERAD, Consortium to Establish A Registry for Alzheimer's Disease; ARTAG, Aging-related tau astrogliopathy; CAA, Capillary Amyloid Angiopathy; GVD, Granulovacuolar degeneration, TAR DNA-binding protein 43: TDP-43. N/A: te…
